# Supplementary material
Source: PubMed Central journal article supplement (PMC5877120)

**TABLE S1: Number of citations by each database and trial register searched**

| <b>Database</b>   | <b>Number of citations</b> |
|-------------------|----------------------------|
| PubMed            | 1,247                      |
| Cochrane (trials) | 346                        |
| Web of Science    | 625                        |
| Embase            | 784                        |
| <b>Total</b>      | <b>3,002</b>               |

Note: Explicit search strategy: (adolescent\* OR children OR pediatric OR youth) AND (anxiety OR social phobia OR social anxiety disorder OR SAD OR generalized anxiety disorder OR GAD OR separation anxiety disorder) AND (selective serotonin reuptake inhibitor OR SSRI OR selective serotonin norepinephrine reuptake inhibitor OR SNRI OR selective serotonin norepinephrine reuptake inhibitor OR fluoxetine OR fluvoxamine OR citalopram OR escitalopram OR fluoxetine OR paroxetine OR venlafaxine OR desvenlafaxine OR duloxetine OR vortioxetine OR vilazodone)

**TABLE S2: Bias assessment in individual studies included in the meta-analysis.**

| <b>Study</b>                      | <b>Sequence generation</b> | <b>Allocation concealment</b> | <b>Blinding participant</b> | <b>Blinding assessor</b> | <b>Selective reporting bias</b> | <b>Attrition bias</b> |
|-----------------------------------|----------------------------|-------------------------------|-----------------------------|--------------------------|---------------------------------|-----------------------|
| Rynn et al, 2001 <sup>1</sup>     | Unclear risk of bias       | Unclear risk of bias          | Low risk of bias            | Unclear risk of bias     | Low risk of bias                | Low risk of bias      |
| RUPP <sup>2</sup>                 | Low risk of bias           | Low risk of bias              | Low risk of bias            | Unclear risk of bias     | Low risk of bias                | Low risk of bias      |
| Birmaher et al, 2003 <sup>3</sup> | Unclear risk of bias       | Low risk of bias              | Low risk of bias            | Unclear risk of bias     | Unclear risk of bias            | Low risk of bias      |
| Wagner et al, 2004 <sup>4</sup>   | Low risk of bias           | Low risk of bias              | Low risk of bias            | Unclear risk of bias     | Low risk of bias                | Low risk of bias      |
| Geller et al, 2007 <sup>5</sup>   | Unclear risk of bias       | Low risk of bias              | Low risk of bias            | Unclear risk of bias     | Unclear risk of bias            | Low risk of bias      |
| March et al, 2007 <sup>6</sup>    | Unclear risk of bias       | Unclear risk of bias          | Low risk of bias            | Unclear risk of bias     | Low risk of bias                | Low risk of bias      |
| Rynn et al, 2007 <sup>7</sup>     | Unclear risk of bias       | Low risk of bias              | Low risk of bias            | Unclear risk of bias     | Unclear risk of bias            | Low risk of bias      |
| Walkup et al, 2008 <sup>8</sup>   | Low risk of bias           | Low risk of bias*             | Low risk of bias*           | Low risk of bias         | Low risk of bias                | Low risk of bias      |
| Strawn et al, 2015 <sup>9</sup>   | Low risk of bias           | Low risk of bias              | Low risk of bias            | Unclear risk of bias     | Low risk of bias                | Low risk of bias      |

Note: Green represents low risk of bias, yellow represents unclear risk of bias, and red represents a high risk of bias.

\*Per the article, “given the greater number of study visits (and hence more reporting opportunities) and the unblinded administration of sertraline in the combination-therapy group, the test of the adverse-event profile of sertraline focused on statistical comparisons between sertraline and placebo and sertraline and cognitive behavioral therapy.” Additionally, “Subjects in the sertraline and placebo groups did not know whether they were receiving active therapy, nor did their clinicians. However, subjects who received combination therapy knew they were receiving active sertraline.” For this analysis, only the SSRI and placebo conditions were compared and therefore the study was classified as “low risk of bias.”

## SUPPLEMENTAL FIGURE LEGENDS

**FIGURE S1: Preferred Reporting Items for Systematic Reviews and Meta-Analyses (PRISMA) Flow Diagram.**

**FIGURE S2: Response trajectory in Selective Serotonin Norepinephrine Reuptake Inhibitor (SSNRI)-treated youth with generalized, separation and social anxiety disorders. Note:** Standardized medication-placebo difference (“Change”) in patients treated with SSNRIs (blue line) did not differ when the atomoxetine study was removed (red line). Green lines represent the 95% credible interval for the model.

**FIGURE S3: Density of Difference in Placebo Response between Industry- and Federally-Funded Studies. Note:** Differences in placebo response between industry- and Federally-funded studies did not significantly differ at baseline (0, 95% CI: -0.122 to 0.122), week 4 (-0.047, 95% CI: -0.226 to 0.131) and week 8 (-0.129, 95% CI: -0.276 to 0.238).

**FIGURE S4: Density of Difference in Placebo Response in Selective Serotonin Reuptake Inhibitor (SSRI) and Selective Serotonin Norepinephrine Reuptake Inhibitor (SSNRI) Studies. Note:** Differences in placebo response between SSRI and SSNRI studies did not significantly differ at baseline (0, 95%CI: -0.119 to 0.119), week 4 (-0.071, 95%CI: -0.255 to 0.111) and week 8 (-0.068, 95% CI: -0.33584 to 0.199826).

### Supplemental References

1. Rynn MA, Siqueland L, Rickels K. Placebo-controlled trial of sertraline in the treatment of children with generalized anxiety disorder. *Am J Psychiatry*. 2001;158(12):2008-2014.
2. Pine DS, Walkup JT, Labellarte MJ, et al. Fluvoxamine for the treatment of anxiety disorders in children and adolescents. *N Engl J Med*. 2001;344:1279-1285.
3. Birmaher B, Axelson D a, Monk K, et al. Fluoxetine for the treatment of childhood anxiety disorders. *J Am Acad Child Adolesc Psychiatry*. 2003;42(4):415-423.
4. Wagner KD, Berard R, Stein MB, et al. A multicenter, randomized, double-blind, placebo-controlled trial of paroxetine in children and adolescents with social anxiety disorder. *Arch Gen Psychiatry*. 2004;61(11):1153-1162.
5. Geller D, Donnelly C, Lopez F, et al. Atomoxetine treatment for pediatric patients with attention-deficit/hyperactivity disorder with comorbid anxiety disorder. *J Am Acad Child Adolesc Psychiatry*. 2007;46(9):1119-1127.
6. March JS, Entusah AR, Rynn M, Albano AM, Tourian KA. A Randomized controlled trial of venlafaxine ER versus placebo in pediatric social anxiety disorder. *Biol Psychiatry*. 2007;62(10):1149-1154.
7. Rynn MA, Riddle MA, Yeung PP, Kunz NR. *Efficacy and Safety of Extended-Release Venlafaxine in the Treatment of Generalized Anxiety Disorder in*

*Children and Adolescents: Two Placebo-Controlled Trials.* The American journal of psychiatry 164, 290-300 (2007).

8. Walkup JT, Albano AM, Piacentini J, et al. Cognitive behavioral therapy, sertraline, or a combination in childhood anxiety. *N Engl J Med.* 2008;359:2753-2766.
9. Strawn JR, Prakash A, Zhang Q, et al. A randomized, placebo-controlled study of duloxetine for the treatment of children and adolescents with generalized anxiety disorder. *J Am Acad Child Adolesc Psychiatry.* 2015;54(4):283-293.

**FIGURE S1:**

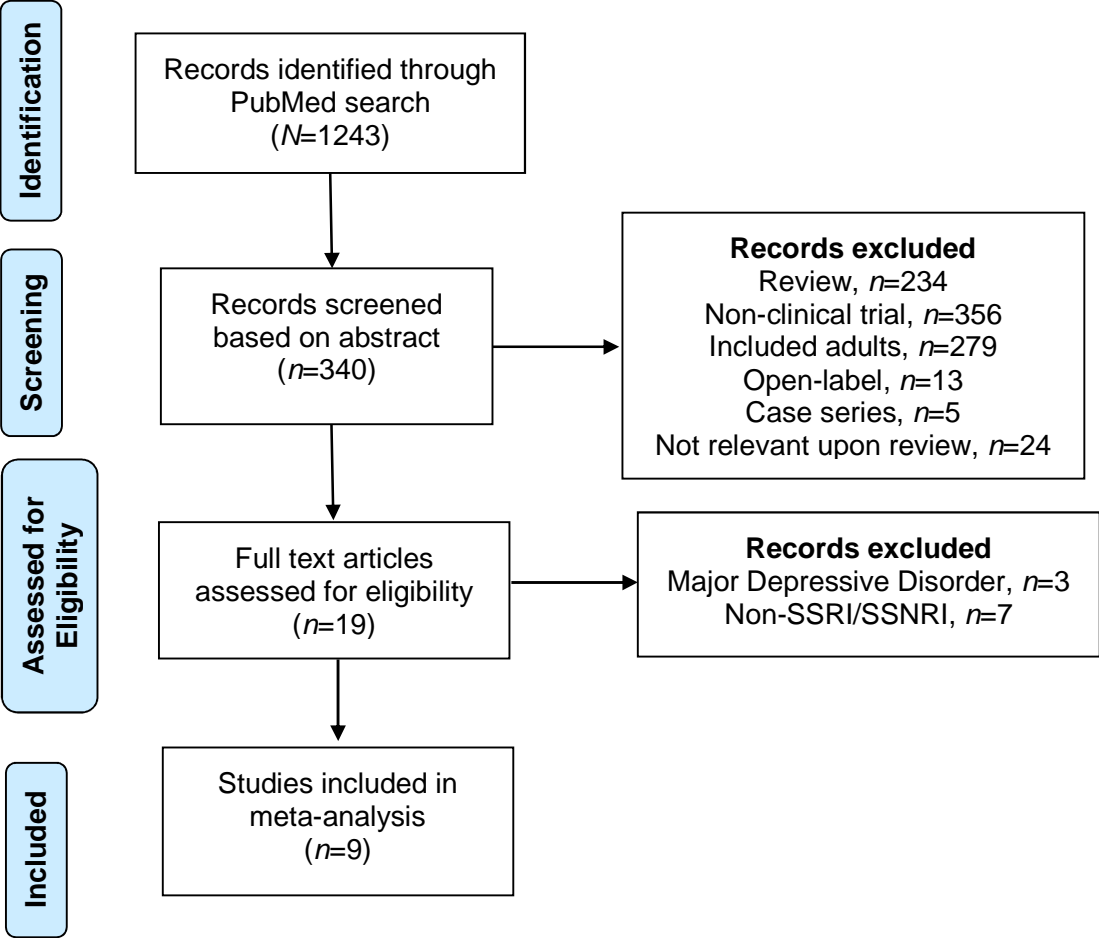

**FIGURE S2:**

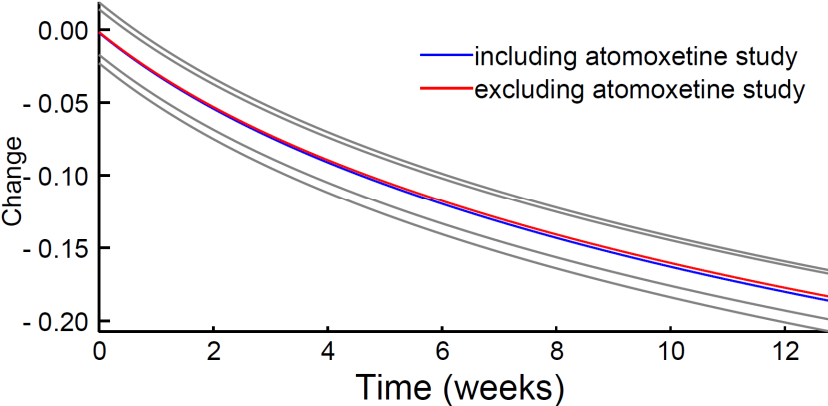

**FIGURE S3:**

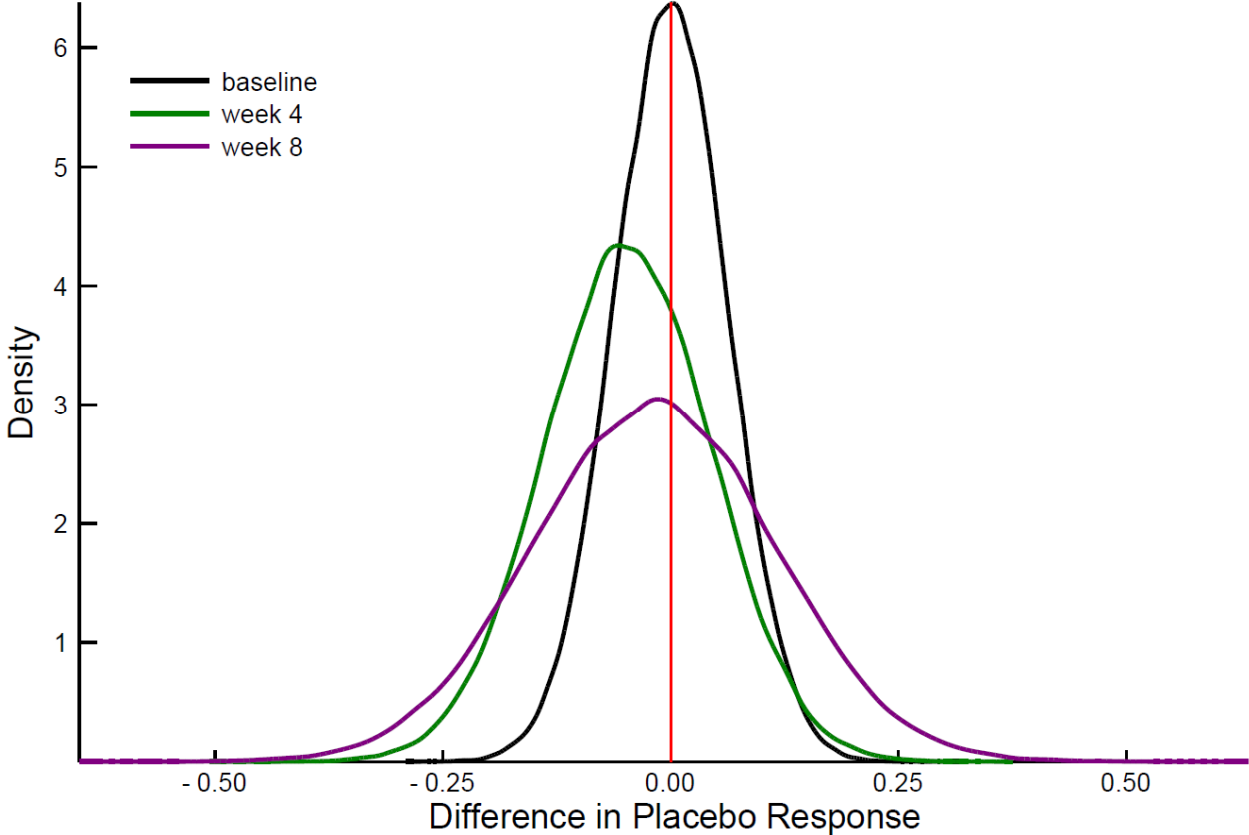

**FIGURE S4:**

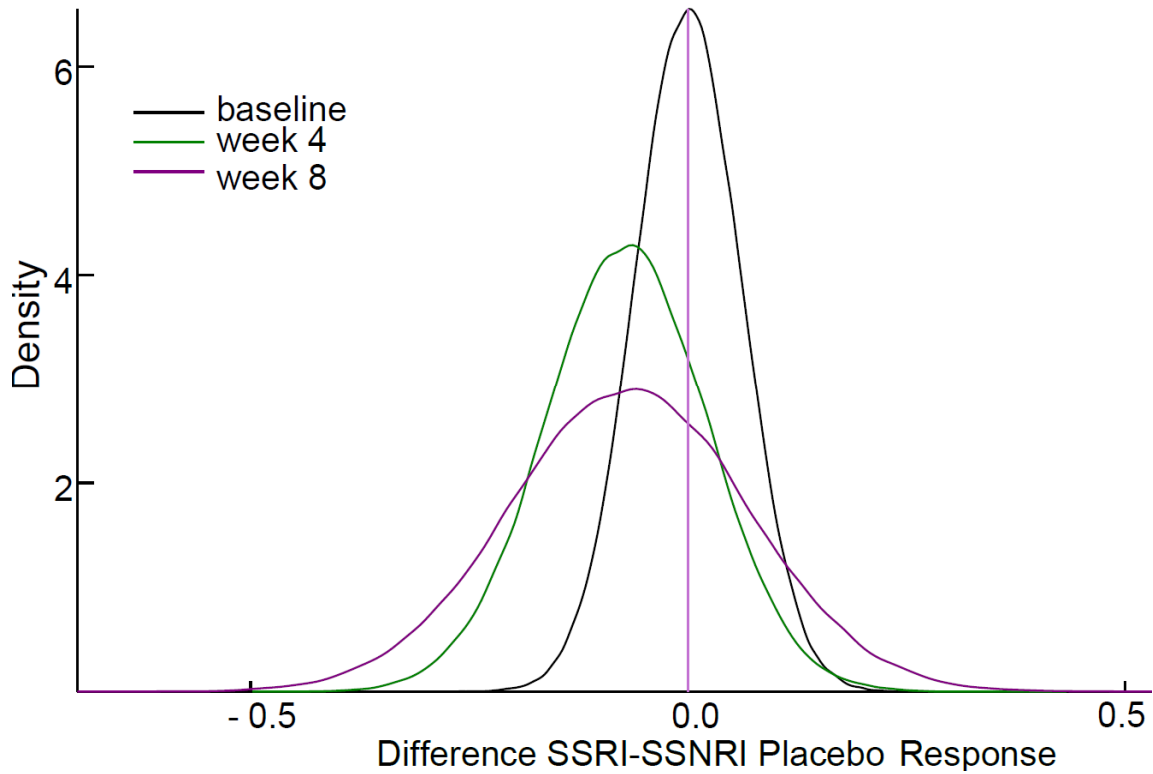

Supplement: NIHMS941579-supplement-supplement_1.pdf [file NIHMS941579-supplement-supplement_1.pdf]
